# Supplementary material
Source: ML conference proceedings conference paper supplement (https://proceedings.neurips.cc/paper_files/paper/2014/hash/7634ea65a4e6d9041cfd3f7de18e334a-Abstract.html)
Supplement: Supplementary file [file 7634ea65a4e6d9041cfd3f7de18e334a-Supplemental.zip]

---

# Supplementary Material: Bayesian Inference for Structured Spike and Slab Priors

---

**Michael Riis Andersen, Ole Winther & Lars Kai Hansen**

DTU Compute, Technical University of Denmark

DK-2800 Kgs. Lyngby, Denmark

{miri, olwi, lkh}@dtu.dk

The purpose of this supplementary document is to provide further details for the paper "Bayesian Inference for Structured Spike and Slab Priors".

## Model specification

The model is a standard linear model of the form

$$\mathbf{y} = \mathbf{A}\mathbf{x} + \mathbf{e} \quad (1)$$

where  $\mathbf{y} \in \mathbb{R}^N$ ,  $\mathbf{x} \in \mathbb{R}^D$ ,  $\mathbf{A} \in \mathbb{R}^{N \times D}$  and  $\mathbf{e} \in \mathbb{R}^N$ . The noise in the system is assumed to be i.i.d. Gaussian distributed

$$p(\mathbf{y}|\mathbf{x}) = \mathcal{N}(\mathbf{y}|\mathbf{A}\mathbf{x}, \sigma_0^2 \mathbf{I}) \quad (2)$$

and we impose a spike and slab model on the prior

$$p(x_i|z_i) = (1 - z_i) \delta(x_i) + z_i \mathcal{N}(x_i|0, \tau) \quad (3)$$

The support variables  $\mathbf{z} = \{z_1, z_2, \dots, z_D\}$  is assumed to be Bernoulli distribution

$$p(z_i|\gamma_i) = \text{Ber}(z_i|\phi(\gamma_i)) \quad (4)$$

where  $\phi: \mathbb{R} \rightarrow (0, 1)$  is the standard normal CDF function. Finally, we impose a multivariate Gaussian density on  $\boldsymbol{\gamma} = \{\gamma_1, \gamma_2, \dots, \gamma_D\}$

$$p(\boldsymbol{\gamma}) = \mathcal{N}(\boldsymbol{\gamma}|\boldsymbol{\mu}_0, \boldsymbol{\Sigma}_0) \quad (5)$$

The joint posterior over  $\mathbf{x}$ ,  $\mathbf{z}$  and  $\boldsymbol{\gamma}$

$$p(\mathbf{x}, \mathbf{z}, \boldsymbol{\gamma}|\mathbf{y}) = \frac{1}{Z} \mathcal{N}(\mathbf{y}|\mathbf{A}\mathbf{x}, \sigma_0^2 \mathbf{I}) \prod_{i=1}^D [(1 - z_i) \delta(x_i) + z_i \mathcal{N}(x_i|0, \tau)] \prod_{i=1}^D \text{Ber}(z_i|\phi(\gamma_i)) \mathcal{N}(\boldsymbol{\gamma}|\boldsymbol{\mu}_0, \boldsymbol{\Sigma}_0) \quad (6)$$

## Variational distribution for Expectation propagation

The joint variational distribution is of the form

$$\begin{aligned} Q(\mathbf{x}, \mathbf{z}, \boldsymbol{\gamma}) &= \mathcal{N}(\mathbf{x}|\tilde{\mathbf{m}}, \tilde{\mathbf{V}}) \prod_{i=1}^D \text{Ber}(z_i|\phi(\tilde{\gamma}_i)) \mathcal{N}(\boldsymbol{\gamma}|\tilde{\boldsymbol{\mu}}, \tilde{\boldsymbol{\Sigma}}) \\ &= \tilde{f}_1(\mathbf{x}) \tilde{f}_2(\mathbf{z}) \tilde{f}_3(\mathbf{z}, \boldsymbol{\gamma}) \tilde{f}_4(\boldsymbol{\gamma}) \\ &= \underbrace{\mathcal{N}(\mathbf{x}|\tilde{\mathbf{m}}_1, \tilde{\mathbf{V}}_1)}_{\tilde{f}_1} \underbrace{\mathcal{N}(\mathbf{x}|\tilde{\mathbf{m}}_2, \tilde{\mathbf{V}}_2) \prod_{i=1}^D \text{Ber}(z_i|\phi(\tilde{\gamma}_{2,i}))}_{\tilde{f}_2} \underbrace{\prod_{i=1}^D \text{Ber}(z_i|\phi(\tilde{\gamma}_{3,i})) \mathcal{N}(\boldsymbol{\gamma}|\tilde{\boldsymbol{\mu}}_3, \tilde{\boldsymbol{\Sigma}}_3)}_{\tilde{f}_3} \underbrace{\mathcal{N}(\boldsymbol{\gamma}|\tilde{\boldsymbol{\mu}}_4, \tilde{\boldsymbol{\Sigma}}_4)}_{\tilde{f}_4} \end{aligned} \quad (7)$$

where  $\tilde{\mathbf{V}}_2$  is diagonal with elements  $\{\tilde{v}_{2,j}\}$  and similar for  $\tilde{\mathbf{\Sigma}}_3$ . We immediately make the following identifications. The first approximation term  $\tilde{f}_1$  corresponds to the likelihood term and the fourth term  $\tilde{f}_4$  corresponds to the prior on  $\gamma$ . Thus, we only have to approximate the parameters in the second and third term, i.e.  $\tilde{f}_2$  and  $\tilde{f}_3$ .

### Computing joint approximation $\mathbf{Q}$ from $\tilde{f}_a$

Given  $\tilde{f}_i$  for  $i = 1, 2, 3, 4$ , we get:

$$\tilde{\mathbf{V}} = \left( \tilde{\mathbf{V}}_1^{-1} + \tilde{\mathbf{V}}_2^{-1} \right)^{-1} \quad (8)$$

$$\tilde{\mathbf{m}} = \left( \tilde{\mathbf{V}}_1^{-1} \tilde{\mathbf{m}}_1 + \tilde{\mathbf{V}}_2^{-1} \tilde{\mathbf{m}}_2 \right) \quad (9)$$

$$\tilde{\mathbf{\Sigma}} = \left( \tilde{\mathbf{\Sigma}}_3^{-1} + \tilde{\mathbf{\Sigma}}_4^{-1} \right)^{-1} \quad (10)$$

$$\tilde{\boldsymbol{\mu}} = \tilde{\mathbf{\Sigma}} \left( \tilde{\mathbf{\Sigma}}_3^{-1} \tilde{\boldsymbol{\mu}}_3 + \tilde{\mathbf{\Sigma}}_4^{-1} \tilde{\boldsymbol{\mu}}_4 \right) \quad (11)$$

$$\tilde{\gamma}_j = t(\tilde{\gamma}_{2,j}, \tilde{\gamma}_{3,j}), \quad \forall j \in \{1, \dots, D\} \quad (12)$$

We have defined the following auxiliary functions

$$d(x, y) = \phi^{-1} \left[ \left( \frac{(1 - \phi(x)) \phi(y)}{(1 - \phi(y)) \phi(x)} + 1 \right)^{-1} \right], \quad t(x, y) = \phi^{-1} \left[ \left( \frac{(1 - \phi(x)) (1 - \phi(y))}{\phi(x) \phi(y)} + 1 \right)^{-1} \right]$$

where  $\phi^{-1}(x)$  is the probit function. The function  $t(\cdot, \cdot)$  amounts to computing the product of two Bernoulli densities parametrized using  $\phi(\cdot)$  and  $d(\cdot, \cdot)$  is the corresponding function for quotients of Bernoulli densities.

### Computing the cavity distributions for $\tilde{f}_2$

$$Q^{\setminus 2,j}(\mathbf{x}, \mathbf{z}, \gamma) = \frac{Q(\mathbf{x}, \mathbf{z}, \gamma)}{f_{2,j}(x_j, z_j)} = \frac{\mathcal{N}(\mathbf{x} | \tilde{\mathbf{m}}, \tilde{\mathbf{V}}) \prod_{i=1}^D \text{Ber}(z_i | \phi(\tilde{\gamma}_i)) \mathcal{N}(\tilde{\gamma} | \tilde{\boldsymbol{\mu}}, \tilde{\mathbf{\Sigma}})}{\text{Ber}(z_j | \phi(\tilde{\gamma}_{2,j})) \mathcal{N}(x_j | \tilde{m}_{2,j}, \tilde{v}_{2,j})} \quad (13)$$

The parameters for the  $j$ 'th marginal cavity distribution then becomes:

$$v_j^{\setminus 2,j} = \left( \left( \tilde{V}_{jj} \right)^{-1} - \tilde{v}_{2,j}^{-1} \right)^{-1} \quad (14)$$

$$m_j^{\setminus 2,j} = v_j^{\setminus 2,j} \left( \left( \tilde{V}_{jj} \right)^{-1} \tilde{m}_j - \tilde{v}_{2,j}^{-1} \tilde{m}_{2,j} \right), \quad (15)$$

$$\gamma^{\setminus 2,j} = d(\tilde{\gamma}_j, \tilde{\gamma}_{2,j}) \quad (16)$$

### Moment matching for the second term

Computing the normalization for  $f_{2,j} Q^{\setminus 2,j}$ :

$$\begin{aligned} Z_{2,j} &= \sum_{\mathbf{z}} \int \int f_{2,j}(x_j, z_j) Q^{\setminus 2,j}(\mathbf{x}, \mathbf{z}, \gamma) d\gamma d\mathbf{x} \\ &= \sum_{z_j} \int f_{2,j}(x_j, z_j) \sum_{\mathbf{z}_{\setminus j}} \int \int Q^{\setminus 2,j}(\mathbf{x}, \mathbf{z}, \gamma) d\gamma d\mathbf{x}_{\setminus j} dx_j \end{aligned} \quad (17)$$

Plugging in the densities

$$\begin{aligned} Z_{2,j} &= \sum_{z_j} \int [(1 - z_j) \delta(x_j) + z_j \mathcal{N}(x_j | 0, \tau)] \sum_{\mathbf{z}_{\setminus j}} \int \int \mathcal{N}(\mathbf{x} | \mathbf{m}^{\setminus 2,j}, \mathbf{V}^{\setminus 2,j}) \prod_{i=1}^D \text{Ber}(z_i | \phi(\gamma_i^{\setminus 2,j})) \mathcal{N}(\gamma | \tilde{\boldsymbol{\mu}}, \tilde{\mathbf{\Sigma}}) d\gamma d\mathbf{x}_{\setminus j} \\ &= \sum_{z_j} \int [(1 - z_j) \delta(x_j) + z_j \mathcal{N}(x_j | 0, \tau)] \text{Ber}(z_j | \phi(\gamma_j^{\setminus 2,j})) \mathcal{N}(x_j | m_j^{\setminus 2,j}, v_j^{\setminus 2,j}) dx_j \\ &= \left( 1 - \phi(\gamma_j^{\setminus 2,j}) \right) \mathcal{N}(0 | m_j^{\setminus 2,j}, v_j^{\setminus 2,j}) + \phi(\gamma_j^{\setminus 2,j}) \mathcal{N}(x_j | m_j^{\setminus 2,j}, \tau + v_j^{\setminus 2,j}) \end{aligned} \quad (18)$$

For the moment matching, we need the following moments:

$$\mathbb{E}_{f_{2,j}Q^{\setminus 2,j}}[\mathbf{x}], \quad \mathbb{E}_{f_{2,j}Q^{\setminus 2,j}}[\mathbf{x}\mathbf{x}^T], \quad \& \quad \mathbb{E}_{f_{2,j}Q^{\setminus 2,j}}[\mathbf{z}] \quad (19)$$

The moment matching results in the following update equations:

$$v_{jj}^{\text{new}} = \frac{a_j}{a_j + b_j} \left[ \frac{(m_j^{\setminus 2,j} \tau)^2}{(v_j^{\setminus 2,j} + \tau)^2} + \frac{v_j^{\setminus 2,j} \tau}{v_j^{\setminus 2,j} + \tau} \right] - \left[ \frac{a_j}{a_j + b_j} \frac{m_j^{\setminus 2,j} \tau}{v_j^{\setminus 2,j} + \tau} \right]^2$$

$$\tilde{v}_{2,j}^{\text{new}} = \left[ (v_{jj}^{\text{new}})^{-1} - (v_j^{\setminus 2,j})^{-1} \right]^{-1} \quad (20)$$

$$m_j^{\text{new}} = \frac{a_j}{a_j + b_j} \frac{m_j^{\setminus 2,j} \tau}{v_j^{\setminus 2,j} + \tau} \quad (21)$$

$$\tilde{m}_{2,j}^{\text{new}} = v_{2,j}^{\text{new}} \left( (v_j^{\text{new}})^{-1} m_j^{\text{new}} - (v_j^{\setminus 2,j})^{-1} m_j^{\setminus 2,j} \right) \quad (22)$$

$$\tilde{\gamma}_j^{\text{new}} = \phi^{-1} \left( \frac{a_j}{a_j + b_j} \right) \quad (23)$$

$$\tilde{\gamma}_j^{\text{new}} = d \left( \tilde{\gamma}_j^{\text{new}}, \gamma_j^{\setminus 2,j} \right) \quad (24)$$

where

$$a_j = \phi \left( \gamma_j^{\setminus 2,j} \right) \mathcal{N} \left( 0 | m_j^{\setminus 2,j}, \tau + v_j^{\setminus 2,j} \right) \quad (25)$$

$$b_j = \left( 1 - \phi \left( \gamma_j^{\setminus 2,j} \right) \right) \mathcal{N} \left( 0 | m_j^{\setminus 2,j}, v_{jj}^{\setminus 2,j} \right) \quad (26)$$

### Computing the cavity distributions for the third term

$$Q^{\setminus 3,j}(\mathbf{x}, \mathbf{z}, \gamma) = \frac{Q(\mathbf{x}, \mathbf{z}, \gamma)}{f_{3,j}(z_j, \gamma_j)} = \frac{\mathcal{N}(\mathbf{x} | \tilde{\mathbf{m}}, \tilde{\mathbf{V}}) \prod_{i=1}^D \text{Ber}(z_i | \phi(\tilde{\gamma}_i)) \mathcal{N}(\gamma | \tilde{\boldsymbol{\mu}}, \tilde{\boldsymbol{\Sigma}})}{\text{Ber}(z_j | \phi(\tilde{\gamma}_{3,j})) \mathcal{N}(\gamma_j | \tilde{\mu}_{3,j}, \tilde{\Sigma}_{3,j})} \quad (27)$$

The parameters for the  $j$ 'th marginal cavity distribution then becomes

$$\Sigma_j^{\setminus 3,j} = \left( (\tilde{V}_{jj})^{-1} - (\tilde{\Sigma}_{3,j})^{-1} \right)^{-1} \quad (28)$$

$$\mu_j^{\setminus 3,j} = \Sigma_j^{\setminus 3,j} \left( (\tilde{V}_{jj})^{-1} \tilde{m}_j - (\tilde{\Sigma}_{3,j})^{-1} \tilde{\mu}_{3,j} \right), \quad (29)$$

$$\gamma_j^{\setminus 3,j} = d(\tilde{\gamma}_j, \tilde{\gamma}_{3,j}) \quad (30)$$

### Moment matching for the third term

We need to following moments

$$\mathbb{E}_{f_{3,j}Q^{\setminus 3,j}}[\gamma], \quad \mathbb{E}_{f_{3,j}Q^{\setminus 3,j}}[\gamma\gamma^T], \quad \& \quad \phi(\gamma)^{\text{new}} = \mathbb{E}_{f_{3,j}Q^{\setminus 3,j}}[\mathbf{z}] \quad (31)$$

Computing the normalization for  $f_{3,j}Q^{\setminus 3,j}$

$$\begin{aligned} Z_{3,j} &= \sum_{\mathbf{z}} \int \int f_{3,j}(z_j, \gamma_j) Q^{\setminus 3,j}(\mathbf{x}, \mathbf{z}, \gamma) d\gamma d\mathbf{x} \\ &= \sum_{z_j} \int f_{3,j}(z_j, \gamma_j) \sum_{\mathbf{z}_{\setminus j}} \int \int Q^{\setminus 3,j}(\mathbf{x}, \mathbf{z}, \gamma) d\mathbf{x} d\gamma_{\setminus j} d\gamma_j \\ &= \sum_{z_j} \int f_{3,j}(z_j, \gamma_j) Q^{\setminus 3,j}(z_j, \gamma_j) d\gamma_j \end{aligned} \quad (32)$$

where  $\mathbf{x}$ ,  $\mathbf{z}_{\setminus j}$  and  $\gamma_{\setminus j}$  are marginalized out. Plugging in the densities

$$Z_{3,j} = \sum_{z_j} \int \text{Ber}(z_j | \phi(\gamma_j)) \text{Ber}(z_j | \phi(\gamma_j^{\setminus 3,j})) \mathcal{N}(\gamma_j | \mu_j^{\setminus 3,j}, \Sigma_j^{\setminus 3,j}) d\gamma_j \quad (33)$$

Carrying out the sum

$$Z_{3,j} = \int \left[ (1 - \phi(\gamma_j)) (1 - \phi(\gamma_j^{\setminus 3,j})) + \phi(\gamma_j) \phi(\gamma_j^{\setminus 3,j}) \right] \mathcal{N}(\gamma_j | \mu_j^{\setminus 3,j}, \Sigma_j^{\setminus 3,j}) d\gamma_j \quad (34)$$

Applying linearity of integrals

$$\begin{aligned} Z_{3,j} &= \left( 1 - \phi(\gamma_j^{\setminus 3,j}) \right) \int (1 - \phi(\gamma_j)) \mathcal{N}(\gamma_j | \mu_j^{\setminus 3,j}, \Sigma_j^{\setminus 3,j}) d\gamma_j \\ &\quad + \phi(\gamma_j^{\setminus 3,j}) \int \phi(\gamma_j) \mathcal{N}(\gamma_j | \mu_j^{\setminus 3,j}, \Sigma_j^{\setminus 3,j}) d\gamma_j \end{aligned} \quad (35)$$

The integral evaluate to

$$\int \phi(\gamma_j) \mathcal{N}(\gamma_j | \mu_j^{\setminus 3,j}, \Sigma_j^{\setminus 3,j}) d\gamma_j = \phi\left(\frac{\mu_j^{\setminus 3,j}}{\sqrt{1 + \Sigma_j^{\setminus 3,j}}}\right) = \phi(z) \equiv C_{3,j} \quad (36)$$

where we have defined  $z$  as

$$z = \frac{\mu_j^{\setminus 3,j}}{\sqrt{1 + \Sigma_j^{\setminus 3,j}}} \quad (37)$$

Therefore, the normalization becomes

$$Z_{3,j} = \left( 1 - \phi(\gamma_j^{\setminus 3,j}) \right) (1 - C_{3,j}) + \phi(\gamma_j^{\setminus 3,j}) C_{3,j} \quad (38)$$

Similarly, we compute the first moment of  $\mathbf{z}$

$$\begin{aligned} \phi(\gamma_j)^{\text{new}} &= \frac{1}{Z_{3,j}} \sum_{z_j} \int z_j \cdot f_{3,j}(z_j, \gamma_j) Q^{\setminus 3,j}(z_j, \gamma_j) d\gamma_j \\ &= \frac{1}{Z_{3,j}} \sum_{z_j} \int z_j \text{Ber}(z_j | \phi(\gamma_j)) \text{Ber}(z_j | \phi(\gamma_j^{\setminus 3,j})) \mathcal{N}(\gamma_j | \mu_j^{\setminus 3,j}, \Sigma_j^{\setminus 3,j}) d\gamma_j \\ &= \frac{1}{Z_{3,j}} \phi(\gamma_j^{\setminus 3,j}) \int \phi(\gamma_j) \mathcal{N}(\gamma_j | \mu_j^{\setminus 3,j}, \Sigma_j^{\setminus 3,j}) d\gamma_j \\ &= \frac{1}{Z_{3,j}} \phi(\gamma_j^{\setminus 3,j}) C_{3,j} \end{aligned} \quad (39)$$

where the result in eq. (36) is used. Therefore

$$\gamma_j^{\text{new}} = \phi^{-1}\left(\frac{1}{Z_{3,j}} \phi(\gamma_j^{\setminus 3,j}) C_{3,j}\right) \quad (40)$$

Hence, the update becomes

$$\tilde{\gamma}_{3,j} = d\left(\gamma_j^{\text{new}}, \gamma_j^{\setminus 3,j}\right) \quad (41)$$

Similarly, the first moment w.r.t.  $\gamma_j$  evaluates to

$$\begin{aligned} \mu_j^{\text{new}} &= \frac{1}{Z_{3,j}} \sum_{z_j} \int \gamma_j \text{Ber}(z_j | \phi(\gamma_j)) \text{Ber}(z_j | \phi(\gamma_j^{\setminus 3,j})) \mathcal{N}(\gamma_j | \mu_j^{\setminus 3,j}, \Sigma_j^{\setminus 3,j}) d\gamma_j \\ &= \frac{1}{Z_{3,j}} \int \gamma_j \left[ (1 - \phi(\gamma_j)) (1 - \phi(\gamma_j^{\setminus 3,j})) + \phi(\gamma_j) \phi(\gamma_j^{\setminus 3,j}) \right] \mathcal{N}(\gamma_j | \mu_j^{\setminus 3,j}, \Sigma_j^{\setminus 3,j}) d\gamma_j \\ &= \frac{1}{Z_{3,j}} \left( 1 - \phi(\gamma_j^{\setminus 3,j}) \right) \int \gamma_j (1 - \phi(\gamma_j)) \mathcal{N}(\gamma_j | \mu_j^{\setminus 3,j}, \Sigma_j^{\setminus 3,j}) d\gamma_j \\ &\quad + \frac{1}{Z_{3,j}} \phi(\gamma_j^{\setminus 3,j}) \int \gamma_j \phi(\gamma_j) \mathcal{N}(\gamma_j | \mu_j^{\setminus 3,j}, \Sigma_j^{\setminus 3,j}) d\gamma_j \end{aligned} \quad (42)$$

Using the the results from ch. 3.9 in the Gaussian process book ([www.gpml.org](http://www.gpml.org)), we have the following result:

$$\int \gamma_j \phi(\gamma_j) \mathcal{N}(\gamma_j | \mu_j^{\setminus 3,j}, \Sigma_j^{\setminus 3,j}) d\gamma_j = C_{3,j} \left( \mu_j^{\setminus 3,j} + \frac{\Sigma_j^{\setminus 3,j} \mathcal{N}(z|0,1)}{C_{3,j} \sqrt{1 + \Sigma_j^{\setminus 3,j}}} \right) \quad (43)$$

Note, that the scaling  $C_{3,j}$  is necessary since the integral is not normalized. Now define

$$W_{3,j} = C_{3,j} \mu_j^{\setminus 3,j} + \frac{\Sigma_j^{\setminus 3,j} \mathcal{N}(z|0,1)}{\sqrt{1 + \Sigma_j^{\setminus 3,j}}} \quad (44)$$

and inserting this result yields the expression for the first moment

$$\mu_j^{\text{new}} = \frac{1}{Z_{3,j}} \left[ \left(1 - \phi(\gamma_j^{\setminus 3,j})\right) \left[\mu_j^{\setminus 3,j} - W_{3,j}\right] + \phi(\gamma_j^{\setminus 3,j}) W_{3,j} \right] \quad (45)$$

And for the second moment, we get

$$\begin{aligned} \mathbb{E}_{f_{3,j} Q^{\setminus 3,j}} [\gamma_j^2] &= \frac{1}{Z_{3,j}} \sum_{z_j} \int \gamma_j^2 \text{Ber}(z_j | \phi(\gamma_j)) \text{Ber}(z_j | \phi(\gamma_j^{\setminus 3,j})) \mathcal{N}(\gamma_j | \mu_j^{\setminus 3,j}, \Sigma_j^{\setminus 3,j}) d\gamma_j \\ &= \frac{1}{Z_{3,j}} \left(1 - \phi(\gamma_j^{\setminus 3,j})\right) \left[ \int \gamma_j^2 \mathcal{N}(\gamma_j | \mu_j^{\setminus 3,j}, \Sigma_j^{\setminus 3,j}) d\gamma_j - \int \gamma_j^2 \phi(\gamma_j) \mathcal{N}(\gamma_j | \mu_j^{\setminus 3,j}, \Sigma_j^{\setminus 3,j}) d\gamma_j \right] \\ &\quad + \frac{1}{Z_{3,j}} \phi(\gamma_j^{\setminus 3,j}) \int \gamma_j^2 \phi(\gamma_j) \mathcal{N}(\gamma_j | \mu_j^{\setminus 3,j}, \Sigma_j^{\setminus 3,j}) d\gamma_j \end{aligned} \quad (46)$$

Using the same result for the integral, we get the following result

$$\int \gamma_j^2 \phi(\gamma_j) \mathcal{N}(\gamma_j | \mu_j^{\setminus 3,j}, \Sigma_j^{\setminus 3,j}) d\gamma_j = 2\mu_j^{\setminus 3,j} W_{3,j} + C_{3,j} \left[ \Sigma_j^{\setminus 3,j} - (\mu_j^{\setminus 3,j})^2 \right] - \frac{(\Sigma_j^{\setminus 3,j})^2 z \mathcal{N}(z|0,1)}{(1 + \Sigma_j^{\setminus 3,j})} \equiv M_{3,j}$$

Inserting  $M_{3,j}$ :

$$\mathbb{E}_{f_{3,j} Q^{\setminus 3,j}} [\gamma_j^2] = \frac{1}{Z_{3,j}} \left[ \left(1 - \phi(\gamma_j^{\setminus 3,j})\right) \left[ (\mu_j^{\setminus 3,j})^2 + \Sigma_j^{\setminus 3,j} - M_{3,j} \right] + \phi(\gamma_j^{\setminus 3,j}) M_{3,j} \right] \quad (47)$$

Finally, we obtain the variance as:

$$\Sigma_j^{\text{new}} = \mathbb{E}_{f_{3,j} Q^{\setminus 3,j}} [\gamma_j^2] - \mathbb{E}_{f_{3,j} Q^{\setminus 3,j}} [\gamma_j]^2 \quad (48)$$

The update equations for the mean and variance are then given by:

$$\tilde{\Sigma}_{3,j}^{\text{new}} = \left[ (\Sigma_j^{\text{new}})^{-1} - (\Sigma^{\setminus 3,j})^{-1} \right]^{-1} \quad (49)$$

$$\tilde{\mu}_{3,j}^{\text{new}} = \tilde{\Sigma}_{3,j}^{\text{new}} \left( (\Sigma_j^{\text{new}})^{-1} \mu_j^{\text{new}} - (\Sigma^{\setminus 3,j})^{-1} \mu_j^{\setminus 3,j} \right) \quad (50)$$

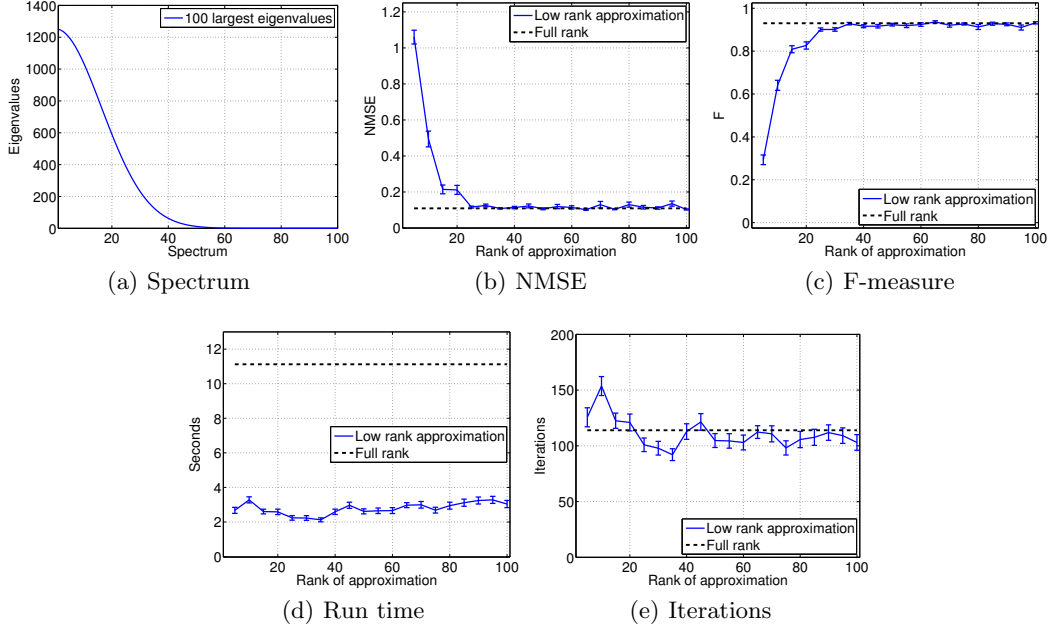

Figure 1: Illustration of the properties of the low rank approximation of  $\Sigma_0$ . Data are generated the way as described for experiment 1 in the paper, except that  $\mathbf{A} \in \mathbb{R}^{125 \times 500}$  and the sparsity level is fixed at  $K/D = 0.1$ .

### Experiment: Effect of low rank approximation

This experiment is designed to investigate the properties and implications of the low rank approximation of  $\Sigma_0$ . We generate the problems in the same ways as in the first experiment (described in the paper), but now sweep over the rank  $R$  of the approximation of  $\Sigma_0$  with fixed problem size, i.e.  $N = 125$  and  $D = 500$ . The results are shown in figure 1. For the specific choice of covariance function, figure 1(b)-(c) shows that a 40-rank approximation does not introduce significant errors in terms of NMSE and F-measure. but the run time is reduced by a factor  $\approx 3.5$ . The reduction is expected to become even more significant as  $D$  increases.

### Experiment: Shepp Logan Recovery

We have also recreated the Shepp-Logan Phantom experiment from [1] with  $D = 10^4$  unknowns,  $K = 1723$  non-zero weights,  $N = 2K$  observations and  $\text{SNR} = 10\text{dB}$ . That is, we generated a set of measurements using the model  $\mathbf{y} = \mathbf{A}\mathbf{x}_0 + \mathbf{e}$ , where the true signal  $\mathbf{x}_0$  is the Shepp-Logan Phantom image (see figure 2a). For the EP method, we imposed a squared exponential covariance function with length-scale 8 for  $\gamma$  defined on the  $100 \times 100$  image grid. We use three methods for reconstruction  $\mathbf{x}_0$ : Our proposed method, BG-AMP [2] and an oracle estimator, which computes a least squares estimate based on knowledge of the true support. We consider the Normalized Mean Square Error (NMSE) of the estimated coefficients  $\hat{\mathbf{x}}$  as well as the F-measure of the estimated support  $\hat{\mathbf{z}}$ . The reconstructions are shown in figure 2, where the first row shows the reconstructed coefficients and the second row shows the reconstructed support. Our proposed method yields  $F_{sq} = 0.994$  and  $\text{NMSE}_{sq} = 0.336$  for this experiment, whereas BG-AMP yields  $F = 0.624$  and  $\text{NMSE} = 0.717$ . For reference, the oracle estimator yields  $\text{NMSE} = 0.326$ .

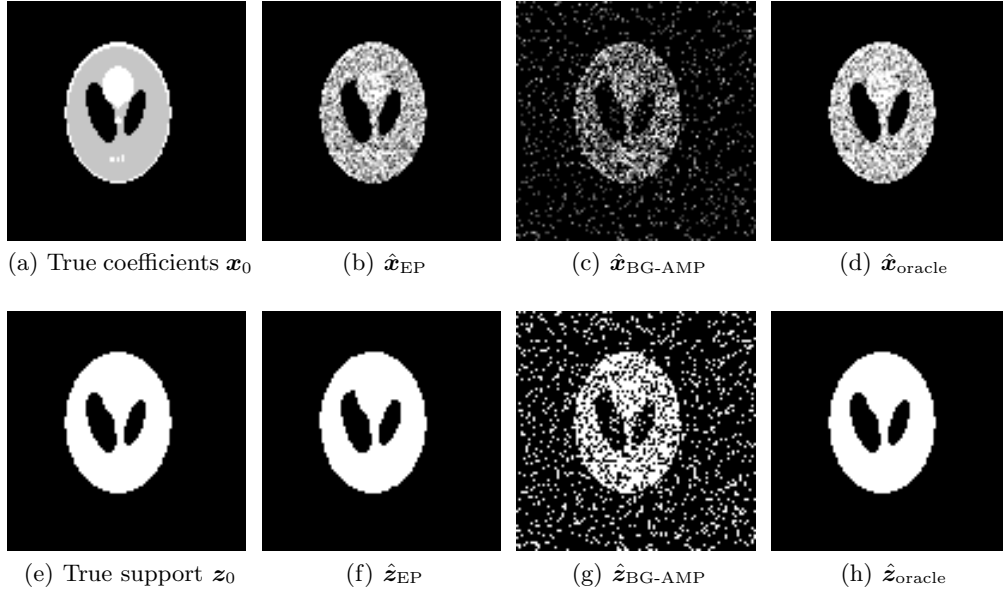

Figure 2: Recovery of the Shepp-Logan Phantom. The first row shows the reconstructed coefficients  $\hat{\mathbf{x}}$  and the second row shows the reconstructed support  $\hat{\mathbf{z}}$ .

## References

- [1] V. Cevher, M. F. Duarte, C. Hegde, and R. G. Baraniuk. Sparse signal recovery using markov random fields. In *NIPS*, Vancouver, B.C., Canada, 8–11 December 2008.
- [2] P. Schniter and J. Vila. Expectation-maximization gaussian-mixture approximate message passing. *2012 46th Annual Conference on Information Sciences and Systems, CISS 2012*, pages –, 2012.
